# Supplementary material for: Effect of monomer/oxidant mole ratio on polymerization mechanism, conductivity and spectral characteristics of mechanochemically prepared polypyrrole
Source: Royal Society of Chemistry journal article supplement (doi:10.1039/c0py00212g), 2010-09-30
Supplement: c0py00212g.pdf [file c0py00212g.pdf]

Supplementary Material (ESI) for Polymer Chemistry  
This journal is (c) The Royal Society of Chemistry 2010

Supporting Information for

**Effect of monomer/oxidant mole ratio on polymerization mechanism,  
conductivity and spectral characteristics of mechanochemically  
prepared polypyrrole**

*Oleg Yu. Posudievsky and Olga A. Kozarenko*

L.V. Pisarzhevsky Institute of Physical Chemistry of the National Academy of Sciences of Ukraine,  
31 prospekt Nauki, Kiev 03028, Ukraine

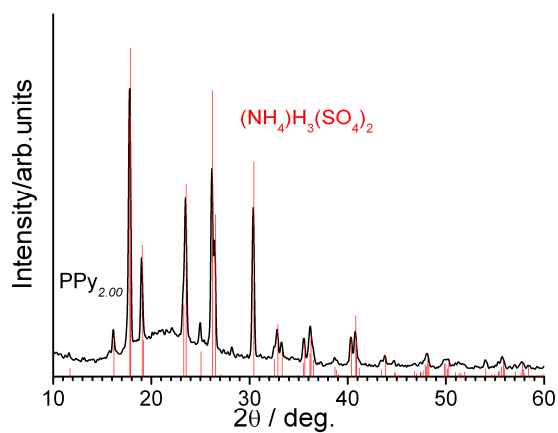

**Fig. S1** X-ray diffraction pattern of the as-received PPy<sub>2.00</sub> (black) and (NH<sub>4</sub>)H<sub>3</sub>(SO<sub>4</sub>)<sub>2</sub> (red) (ICCD PDF2, #77-1899).

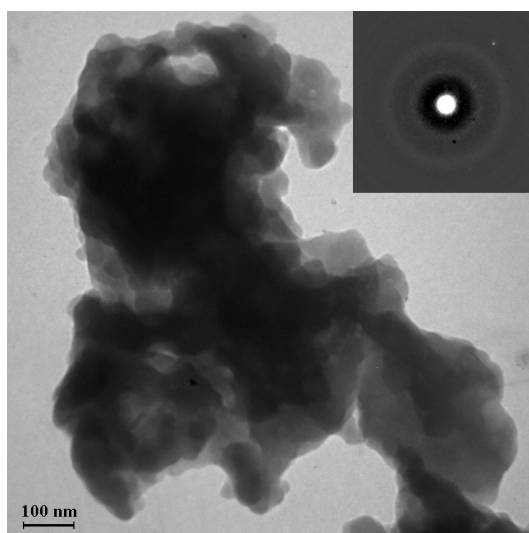

**Fig. S2** Electron micrograph of the aggregate of PPy<sub>0.75</sub> nanoparticles and there electronogram confirming the amorphous nature of the material (inset).
